# Supplementary material for: Recycling Endosomes in Mature Epithelia Restrain Tumorigenic Signaling
Source: Oxford University Press journal article supplement (doi:10.1158/0008-5472.can-18-4075), 2019-06-25
Supplement: 00085472can184075-sup-214475_2_supp_5570982_psrn59.docx [file 00085472can184075-sup-214475_2_supp_5570982_psrn59.docx]

**
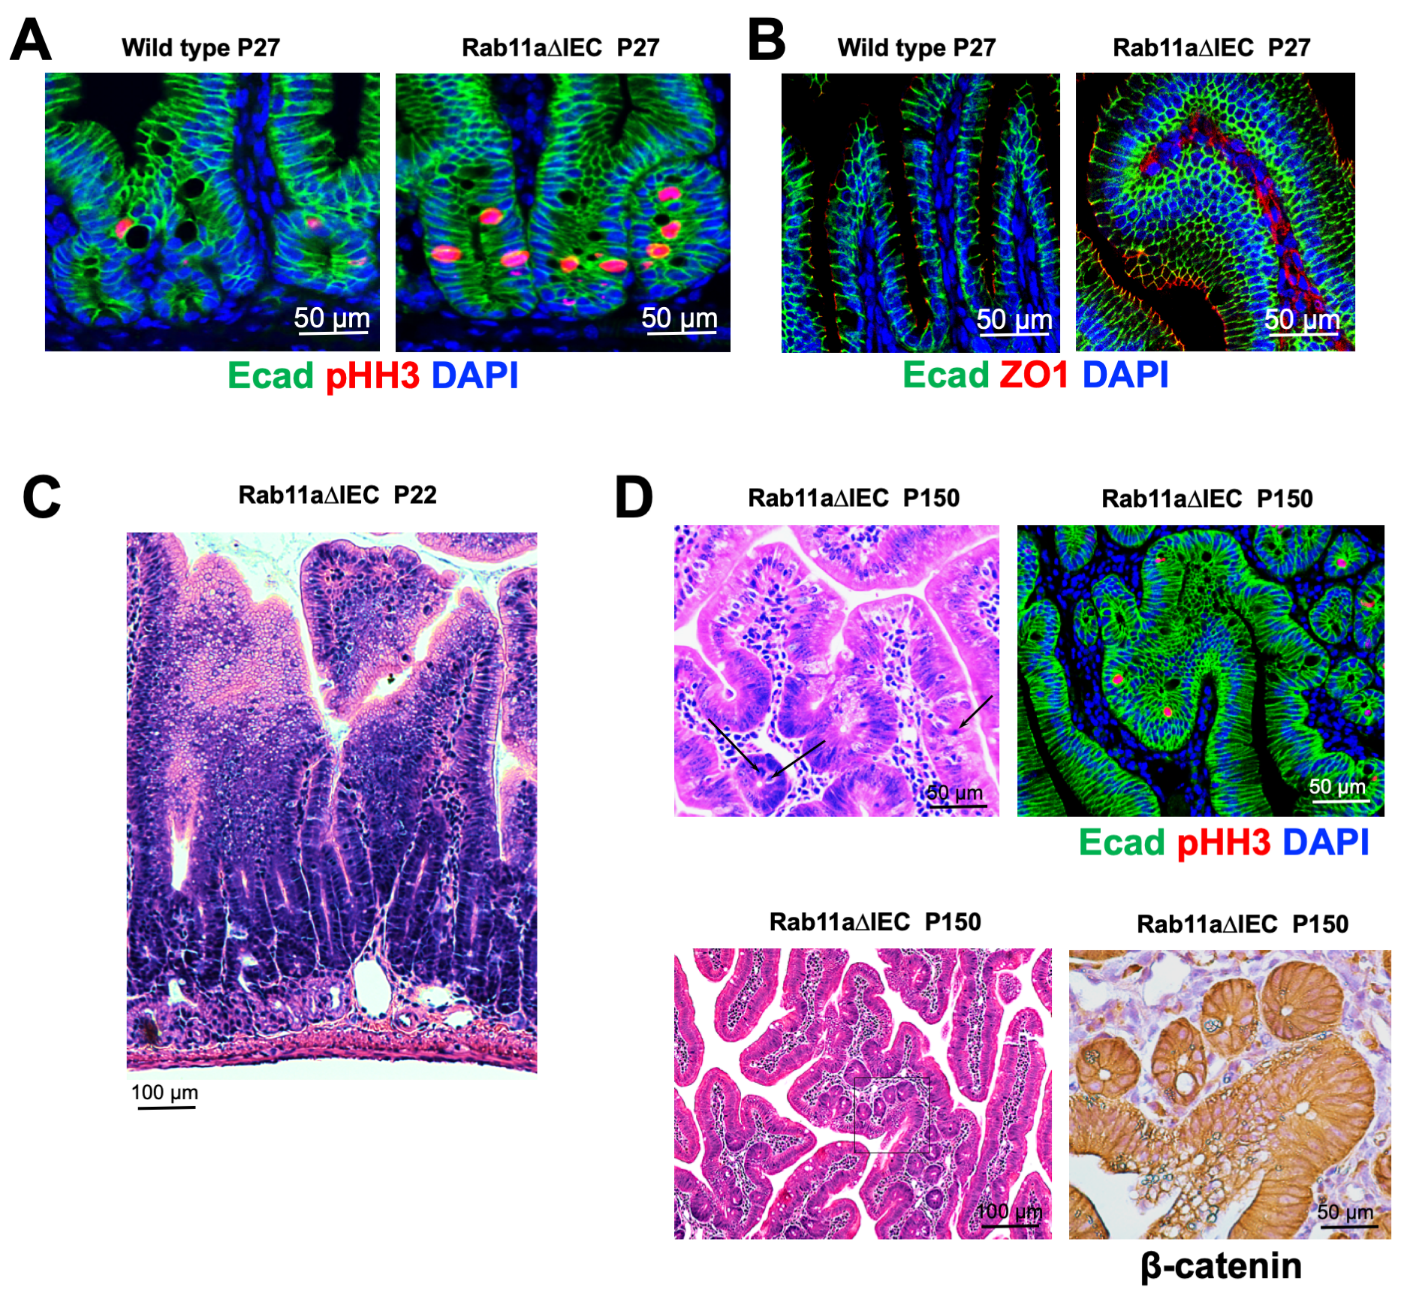
**

**Suppl. Fig. 1.** Rab11aΔIEC mice develop epithelial hyperplasia and dysplasia.

(A) Immunofluorescent staining for pHH3 shows increased proliferation in intestinal crypts of Rab11aΔIEC mice.

(B) Immunofluorescent staining for E-cad and ZO1 shows epithelial dysplasia in intestinal epithelia of Rab11aΔIEC mice.

(C) H.E. staining shows Rab11aΔIEC mice develop tubular adenomas (i.e., low-grade epithelial dysplasia) at juvenile ages.

(D) At postnatal day 150, Rab11aΔIEC mice develop tubular adenomas containing pencil-like, overlapping dysplastic cells (H&E, left lower corner of the left-upper panel), pHH3+ mitotic cells (arrows) and increased level of beta-catenin.
