# Supplementary material for: Recycling Endosomes in Mature Epithelia Restrain Tumorigenic Signaling
Source: Oxford University Press journal article supplement (doi:10.1158/0008-5472.can-18-4075), 2019-06-25
Supplement: 00085472can184075-sup-214475_2_supp_5570985_pszn5z.docx [file 00085472can184075-sup-214475_2_supp_5570985_pszn5z.docx]

**
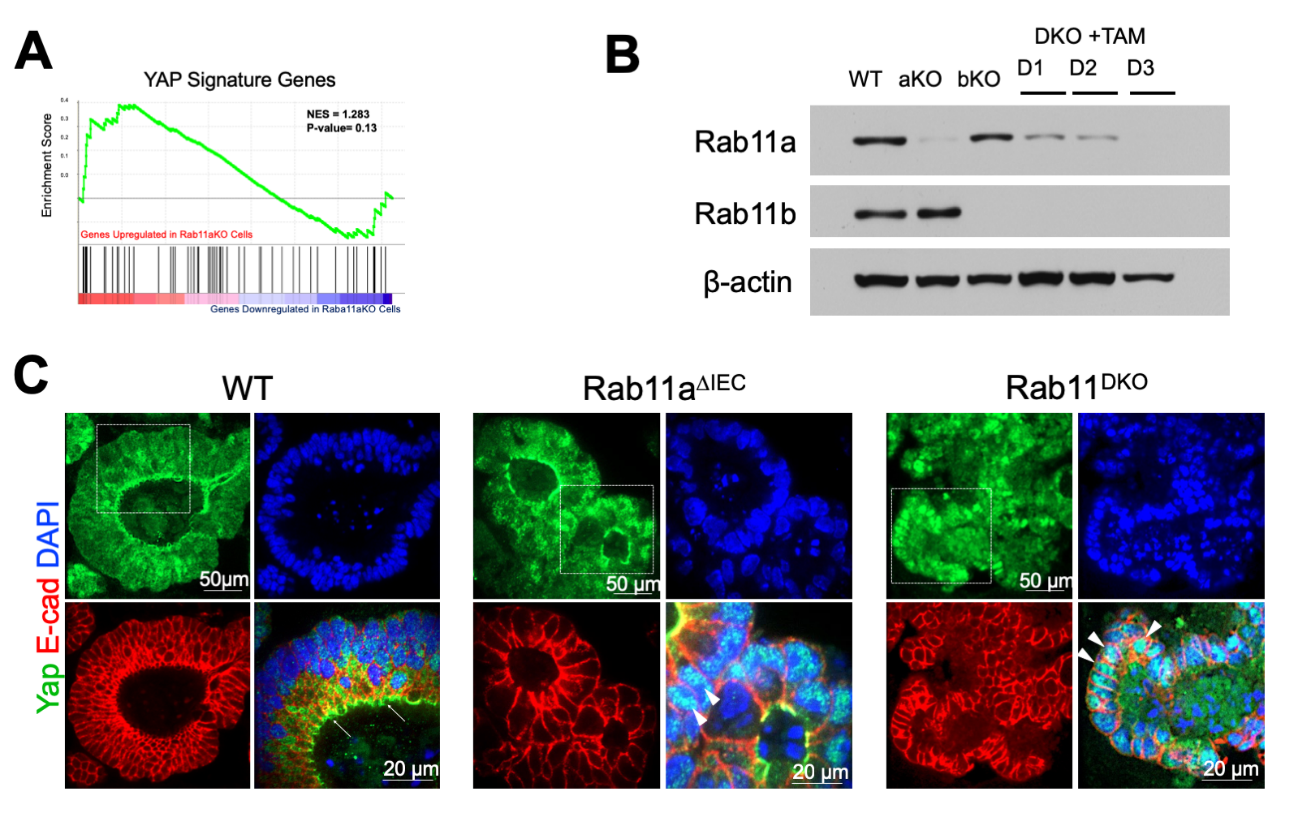
**

**Suppl. Fig. 4.** Induced deletion of Rab11 causes Yap nuclear accumulation.

(A) GSEA analysis shows borderline, but non-significant, statistical significance in enrichment of Yap signature genes upon induced Rab11a deletion in IECs. *p*=0.13.

(B) Western blots for Rab11a and Rab11b show tamoxifen-induced deletion of Rab11a from Rab11aFL/FL;Vil-CreER and Rab11aFL/FL;Vil-CreER; Rab11b-/- (DKO) mice. Note 2 days after tamoxifen injection, there was residual Rab11a proteins.

(C) Enteroids cultured from WT, Rab11aFL/FL;Vil-CreER and Rab11aFL/FL;Vil-CreER; Rab11b-/- (DKO) mice were treated with 4-OHT to delete Rab11a. Co-staining for Yap and E-Cad shows nuclear Yap accumulations in Rab11a and double KO cells (arrows).
