# Supplementary material for: Recycling Endosomes in Mature Epithelia Restrain Tumorigenic Signaling
Source: Oxford University Press journal article supplement (doi:10.1158/0008-5472.can-18-4075), 2019-06-25
Supplement: 00085472can184075-sup-214475_2_supp_5570987_psfn5f.docx [file 00085472can184075-sup-214475_2_supp_5570987_psfn5f.docx]

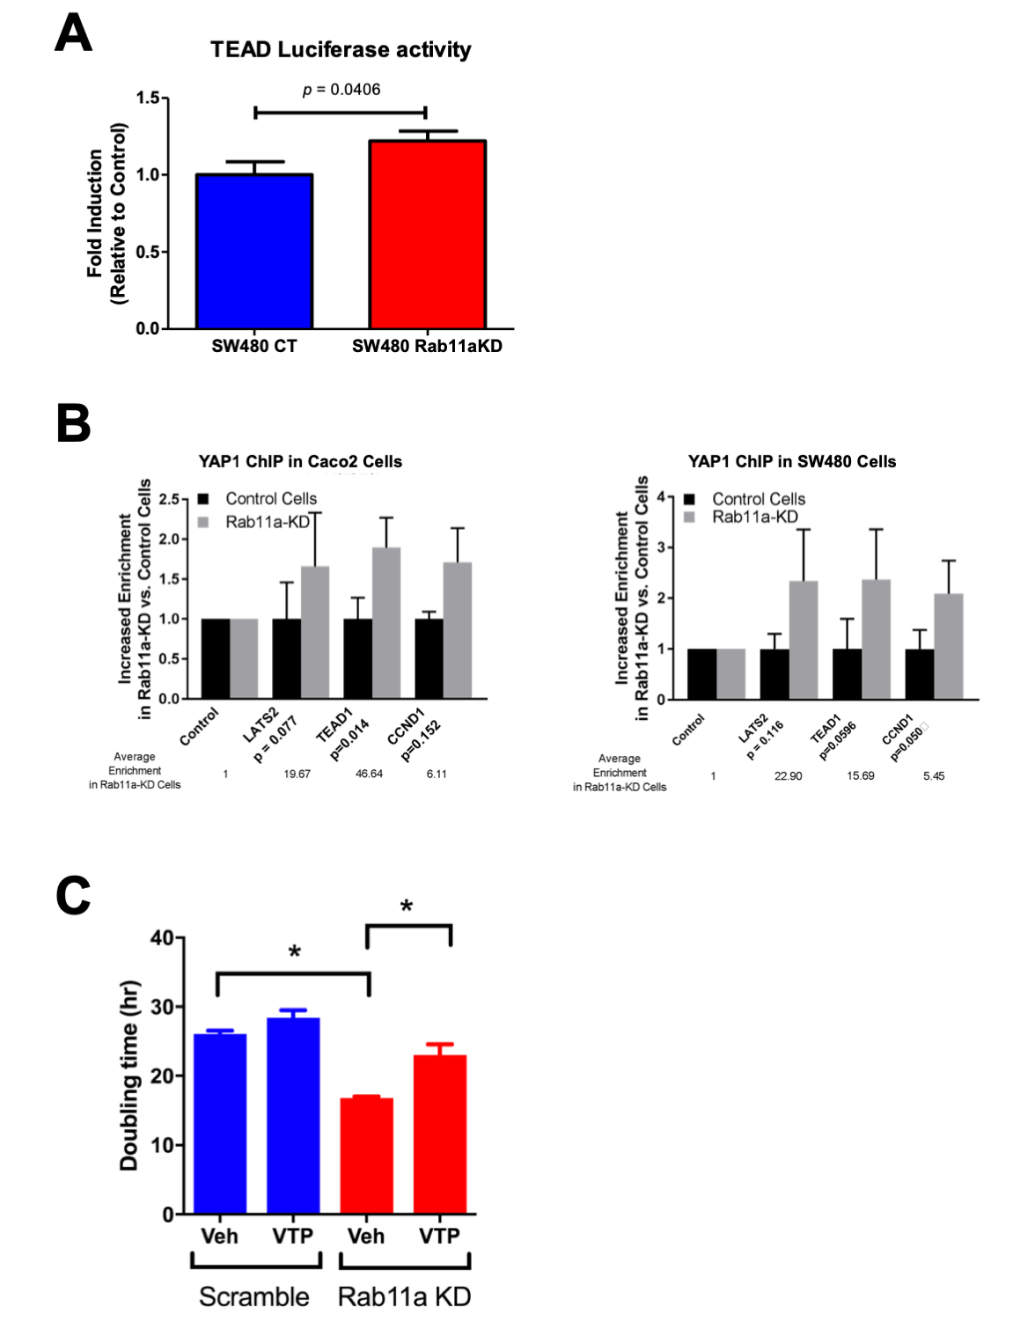


**Suppl. Fig. 6.** RAB11A-KD cells show increased YAP signaling and proliferation.

(A) TEAD reporter assay shows increased canonical YAP activity in RAB11A-KD SW480 cells. Data represent three independent experiments.

(B) YAP1 ChIP assays show increased YAP1 chromatin binding to LATS2, TEAD1, and CCND-1 regulatory elements in both KD Caco2 and SW480 cells.

(C) Doubling time analysis shows that RAB11A-KD Caco2 cells have increased proliferation, which could be suppressed by treating cells with a YAP inhibitor (VTP).
