# Supplementary material for: Recycling Endosomes in Mature Epithelia Restrain Tumorigenic Signaling
Source: Oxford University Press journal article supplement (doi:10.1158/0008-5472.can-18-4075), 2019-06-25
Supplement: 00085472can184075-sup-214475_2_supp_5570989_ps4n5b.docx [file 00085472can184075-sup-214475_2_supp_5570989_ps4n5b.docx]

**KEY RESOURCES TABLE**

| REAGENT or RESOURCE | SOURCE | IDENTIFIER |
| --- | --- | --- |
| Antibodies | | |
| Rabbit anti -YAP (clone D8H1X) | Cell Signaling | 14074, RRID: AB_2650491 |
| Rabbit anti -YAP1 antibody | Abcam | ab52771, RRID:AB_2219141 |
| Rabbit anti - YAP S127 | Cell Signaling | 4911S, RRID:AB_2218913 |
| Rabbit anti - YAP S397 | Cell Signaling | 13619, RRID:AB_2650554 |
| Rabbit anti - pERK | Cell Signaling | 9101 |
| Rabbit anti - β- catenin (clone D10A8) | Cell Signaling | D10A8, RRID:AB_11129256 |
| Rabbit anti - Rab11a | US Biological | R0009, RRID:AB_2284621 |
| Rabbit anti - Rab11b | Sigma Aldrich | HPA054396, RRID:AB_2682474 |
| Rabbit anti - Olfm4 (clone D6Y5A) | Cell Signaling | 39141, RRID: AB_2650511 |
| Rabbit anti – YAP/TAZ (D24E4) | Cell Signaling | 8418, RRID:AB_10950494 |
| Rabbit anti - Ki67 (clone SP6) | Abcam | ab16667, RRID:AB_302459 |
| Rabbit anti - Histone H3 (clone D1H2) | Cell Signaling | 4499, RRID:AB_10544537 |
| Rabbit anti – GAPDH (clone 14C10) | Cell Signaling | 3683, RRID:AB_1642205 |
| Rabbit anti - Phospho-Stat3 (Y705) (clone D3A7) | Cell Signaling | 9145, RRID: AB_2491009 |
| Rabbit anti - Phospho-LATS1 (Ser909) | Cell Signaling | 9157, RRID:AB_2133515 |
| Rabbit anti - Phospho-LATS1 (Thr1079) (clone D57D3) | Cell Signaling | 8654S, RRID:AB_10971635 |
| Rabbit anti - Phospho-LATS1/LATS2 (Ser909, Ser872) | Invitrogen | PA5-64591, RRID:AB_2664907 |
| Rabbit anti - LATS1 (Clone C66B5) | Cell Signaling | 3477, RRID:AB_2133513 |
| Rabbit anti – MOB1 | Cell Signaling | 3863S, RRID:AB_2087851 |
| Rabbit anti - MST1 | Cell Signaling | 3682S, RRID:AB_10694384 |
| Rabbit anti – SAV1(D6M6X) | Cell Signaling | 13301 |
| Rabbit anti - Exportin-1/CRM1 (D6V7N) | Cell Signaling | 46249 |
| Mouse anti – Rab11 | BD Biosciences | 610657, RRID:AB_397984 |
| Mouse anti -E-Cadherin (clone 36/E-Cadherin) | BD Biosciences | 610182, RRID: AB_397581 |
| Mouse anti - AREG/ amphiregulin | Santa Cruz Biotechnology | sc-74501, RRID:AB_1118939 |
| Mouse anti – YAP1 (clone 2F12) | Novus Biologicals | H00010413-M01, RRID: AB_10694607 |
| Mouse anti C- Myc (9E10) | Santacruz | sc-40, RRID:AB_627268 |
| Mouse anti - PCNA (clone CP10) | Santa Cruz Biotechnology | sc-56, RRID: AB_628110 |
| Mouse anti –pan-Cytokeratin (AE13) | Abcam | ab27988, RRID:AB_777047 |
| Mouse anti - Lamin A/C (E-1) | Santa Cruz Biotechnology | sc-376248, RRID:AB_10991536 |
| TO-PRO-3 Iodide (642/661) | Invitrogen | 1830263 |
| 4',6-Diamidino-2-Phenylindole (DAPI) | Santa Cruz | SC3598 |
| Donkey anti-Rabbit, Alexa Fluor 488 | Thermo Fisher Scientific | A-21206 |
| Donkey anti-Rabbit, Alexa Fluor 546 | Thermo Fisher Scientific | A10040 |
| Donkey anti-Mouse, Alexa Fluor 555 | Thermo Fisher Scientific | A-31570 |
| Biotinylated Horse Anti-Mouse IgG Antibody | Vector Laboratories | BA-2000 |
| Biotinylated Horse Anti-Rabbit IgG Antibody | Vector Laboratories | BA-1100 |
| Reagents used |  |  |
| VECTASTAIN Elite ABC HRP Kit (Peroxidase, Standard) | Vector Laboratories | PK-6100 |
| DAB Peroxidase (HRP) Substrate Kit (with Nickel), 3,3’-diaminobenzidine | Vector Laboratories | SK-4100 |
| RNeasy Plus Micro kit | Qiagen | 74034 |
| IntestiCult™ Organoid Growth Medium | STEMCELL Technologies | 06005 |
| Chemicals or Reagents |  |  |
| Citric acid | Sigma-Aldrich | 251275 |
| Donkey serum | Sigma-Aldrich | D9663 |
| Bovine Serum Albumin | Sigma-Aldrich | A3294 |
| Advanced DMEM/F12 medium | Thermo Fisher Scientific | 12634028 |
| SignalStain EDTA Unmasking Solution (10X) | Cell Signaling | 14747 |
| Sepharose A/G beads | Santa Cruz Biotechnology | sc - 2003 |
| Matrigel | Corning | 356231 |
| (Z)-4-Hydroxytamoxifen (4-OHT) | Sigma | H7904 |
| Corning Recovery Solution | Corning | 354253 |
| IntestiCult Ogranoid Growth medium | StemCell Technologies | 06005 |
| DAKO target retrieval solution 10X concentrate | Agilent | S1699 |
| Cytoseal 60 | Thermo Scientific | 83104 |
| Prolong Gold antifade medium | Thermo Fisher Scientific | P36930 |
| Experimental Models: Organisms/Strains |  |  |
| Rab11aflox |  | (Yu et al., 2014a) |
| *APCMin* |  | *(Moser et al., 1990)* |
| Villin-CreER |  | (el Marjou et al., 2004) |
| Villin-Cre |  | (Madison et al., 2002) |
| Rab11b-null |  | This paper |
| Oligonucleotides |  |  |
| IL-6 (Human) Forward, 5’ – AAGCCAGAGCTGTGCAGATG – 3’ and reverse 5’-TGGGTCAGGGGTGGTTATTG – 3’ |  |  |
| IL-6 (Mouse) Forward, 5’ - AAATTTCCTCTGGTCTTCTGGAG – 3’ and reverse, 5’- CGCACTAGGTTTGCCGAGTA- 3’ |  |  |
| AREG (Human) Forward, 5’ – CGGGAGCCGACTATGACTAC – 3’ and reverse, 5’ GGGGGCTTAACTACCTGTTCA – 3’ |  |  |
| Areg (Mouse) Forward, 5’ – GCATCGGCATCGTTATCACA – 3’ and reverse, 5’-TCCCGTTTTCTTGTCGAAGC- 3’ |  |  |
| β – actin (Human) Forward, 5’ – GCACAGAGCCTCGCCTTT – 3’ and reverse, 5’ – GAAGCCGGCCTTCGCACAT – 3’ |  |  |
| Hprt (mouse): Forward, 5’-TCCCTGGTTAAGCAGTACAGC-3’ and reverse, 5’- TCCAACAAAGTCTGGCCTGT-3’ |  |  |
